# Supplementary figures and images for: Head-to-Head Comparison of Two Nomograms Predicting Probability of Lymph Node Invasion in Prostate Cancer and the Therapeutic Impact of Higher Nomogram Threshold
Source: MDPI journal article supplement (doi:10.3390/jcm10050999), 2021-03-02

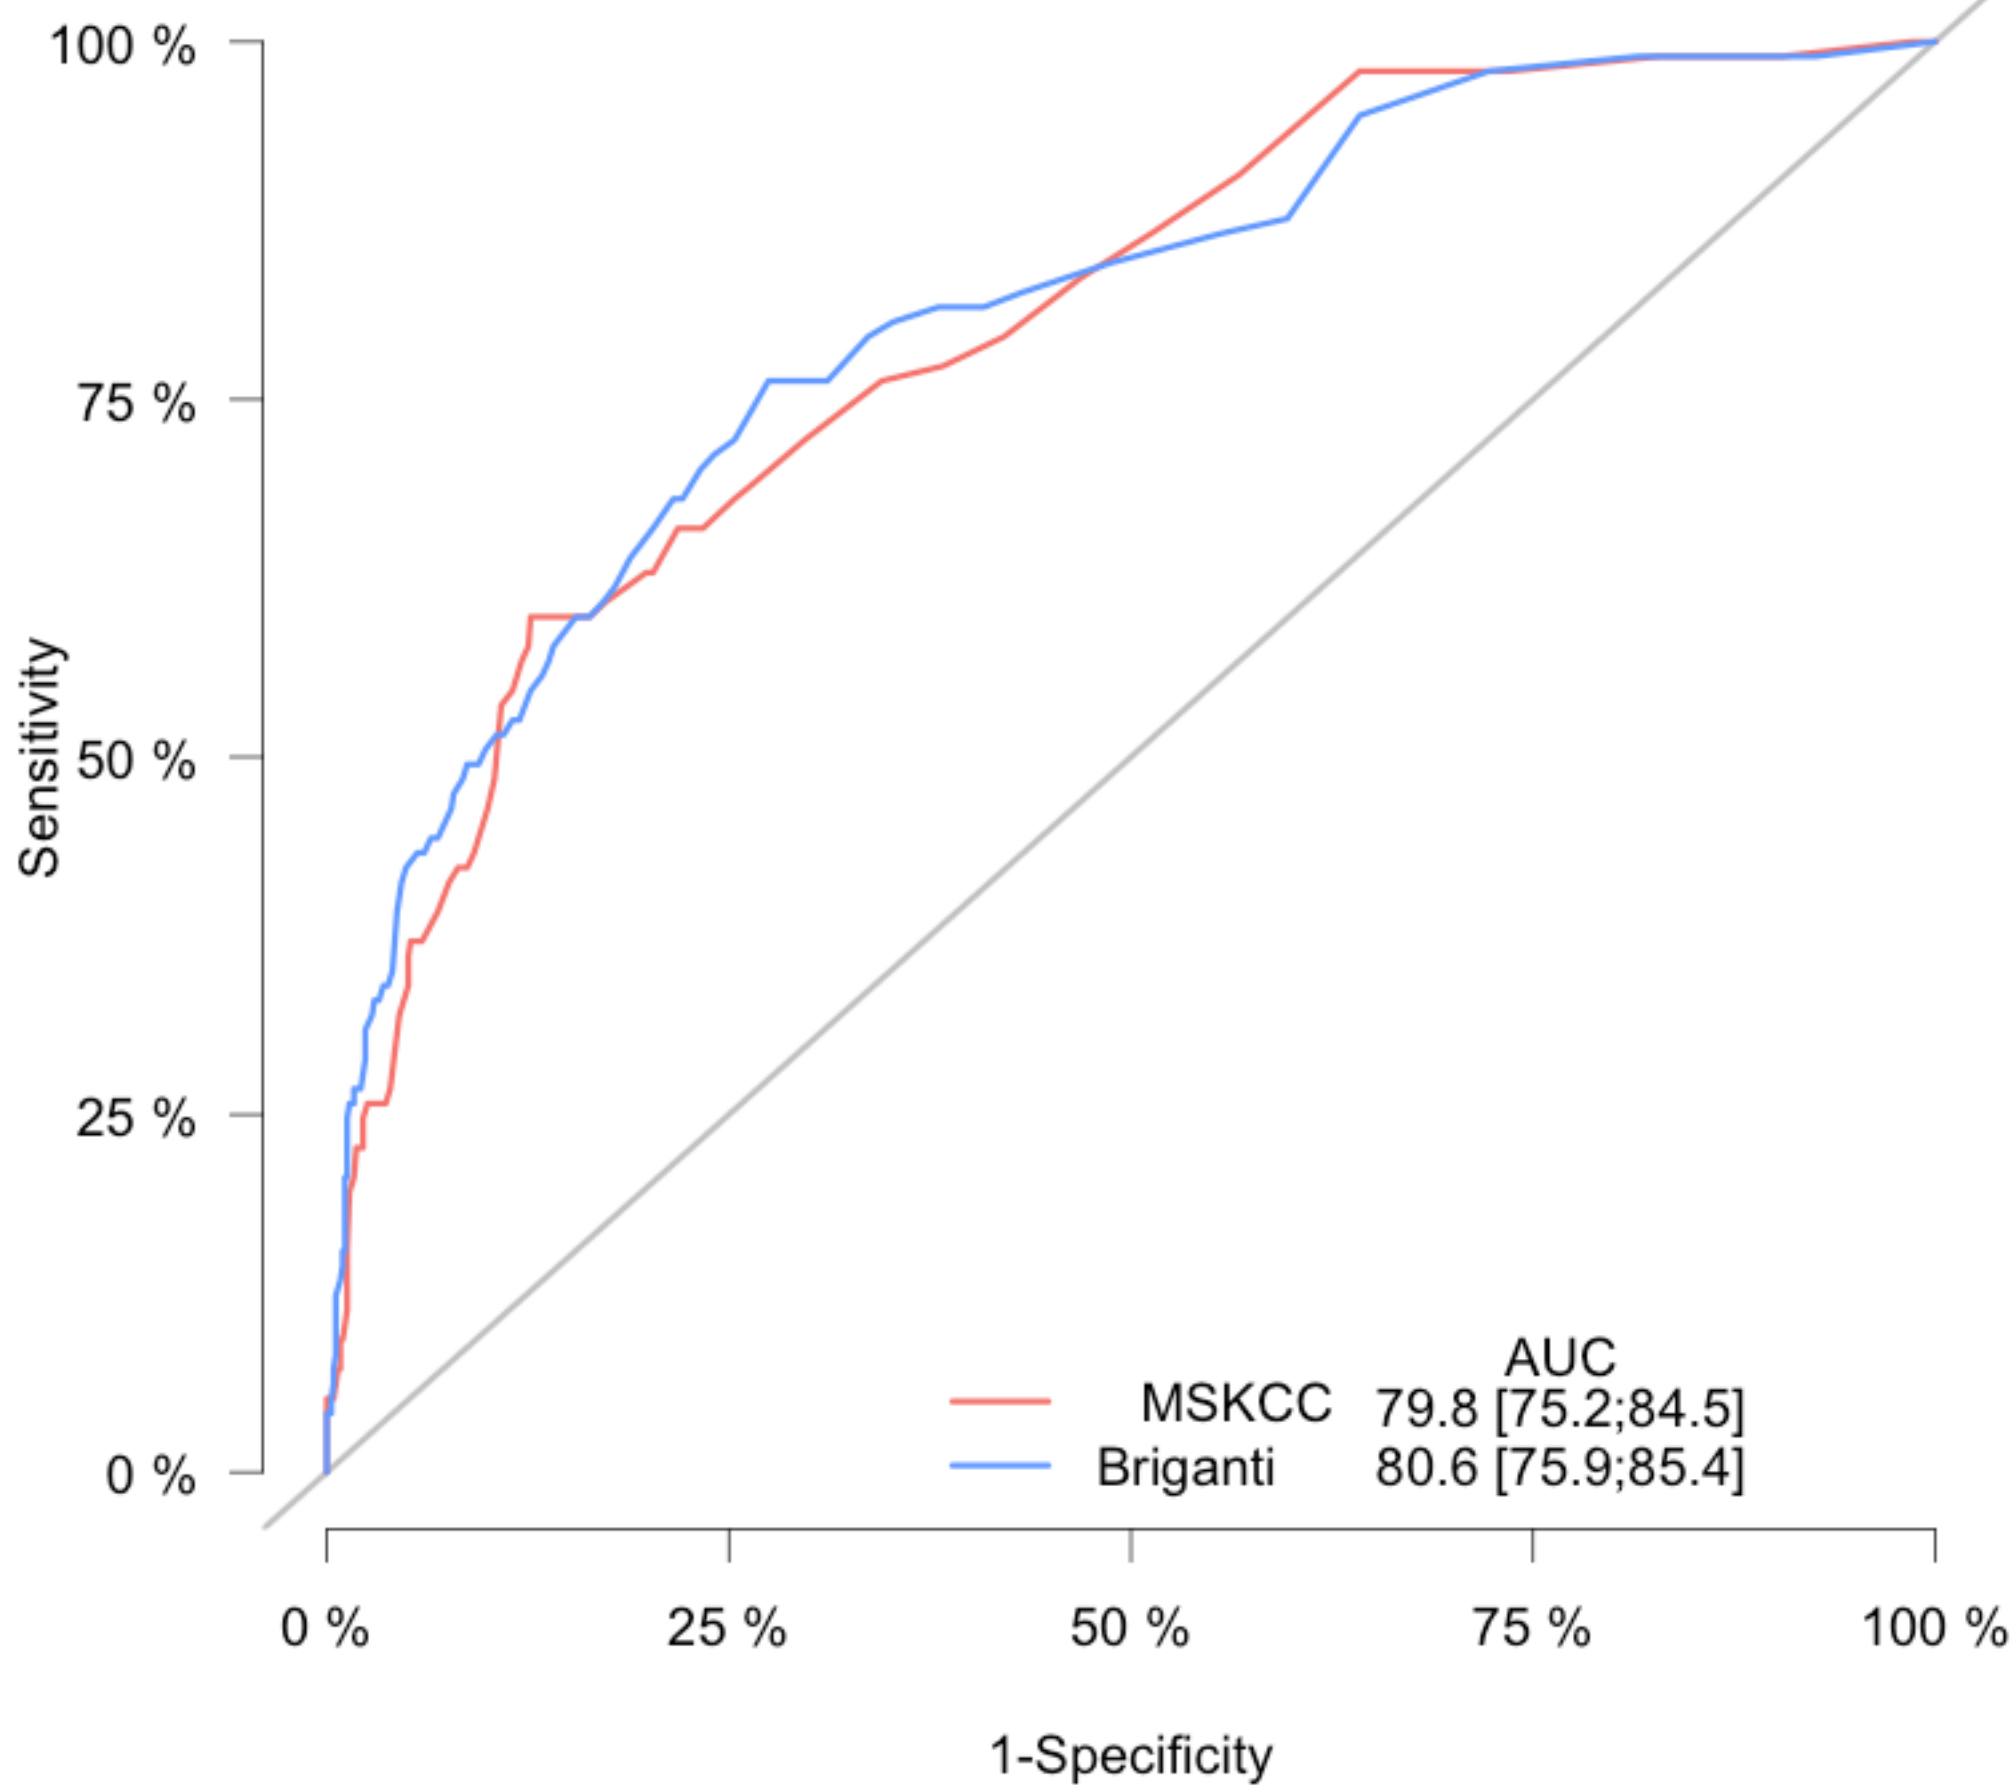

Supplement: s1 [file s1]

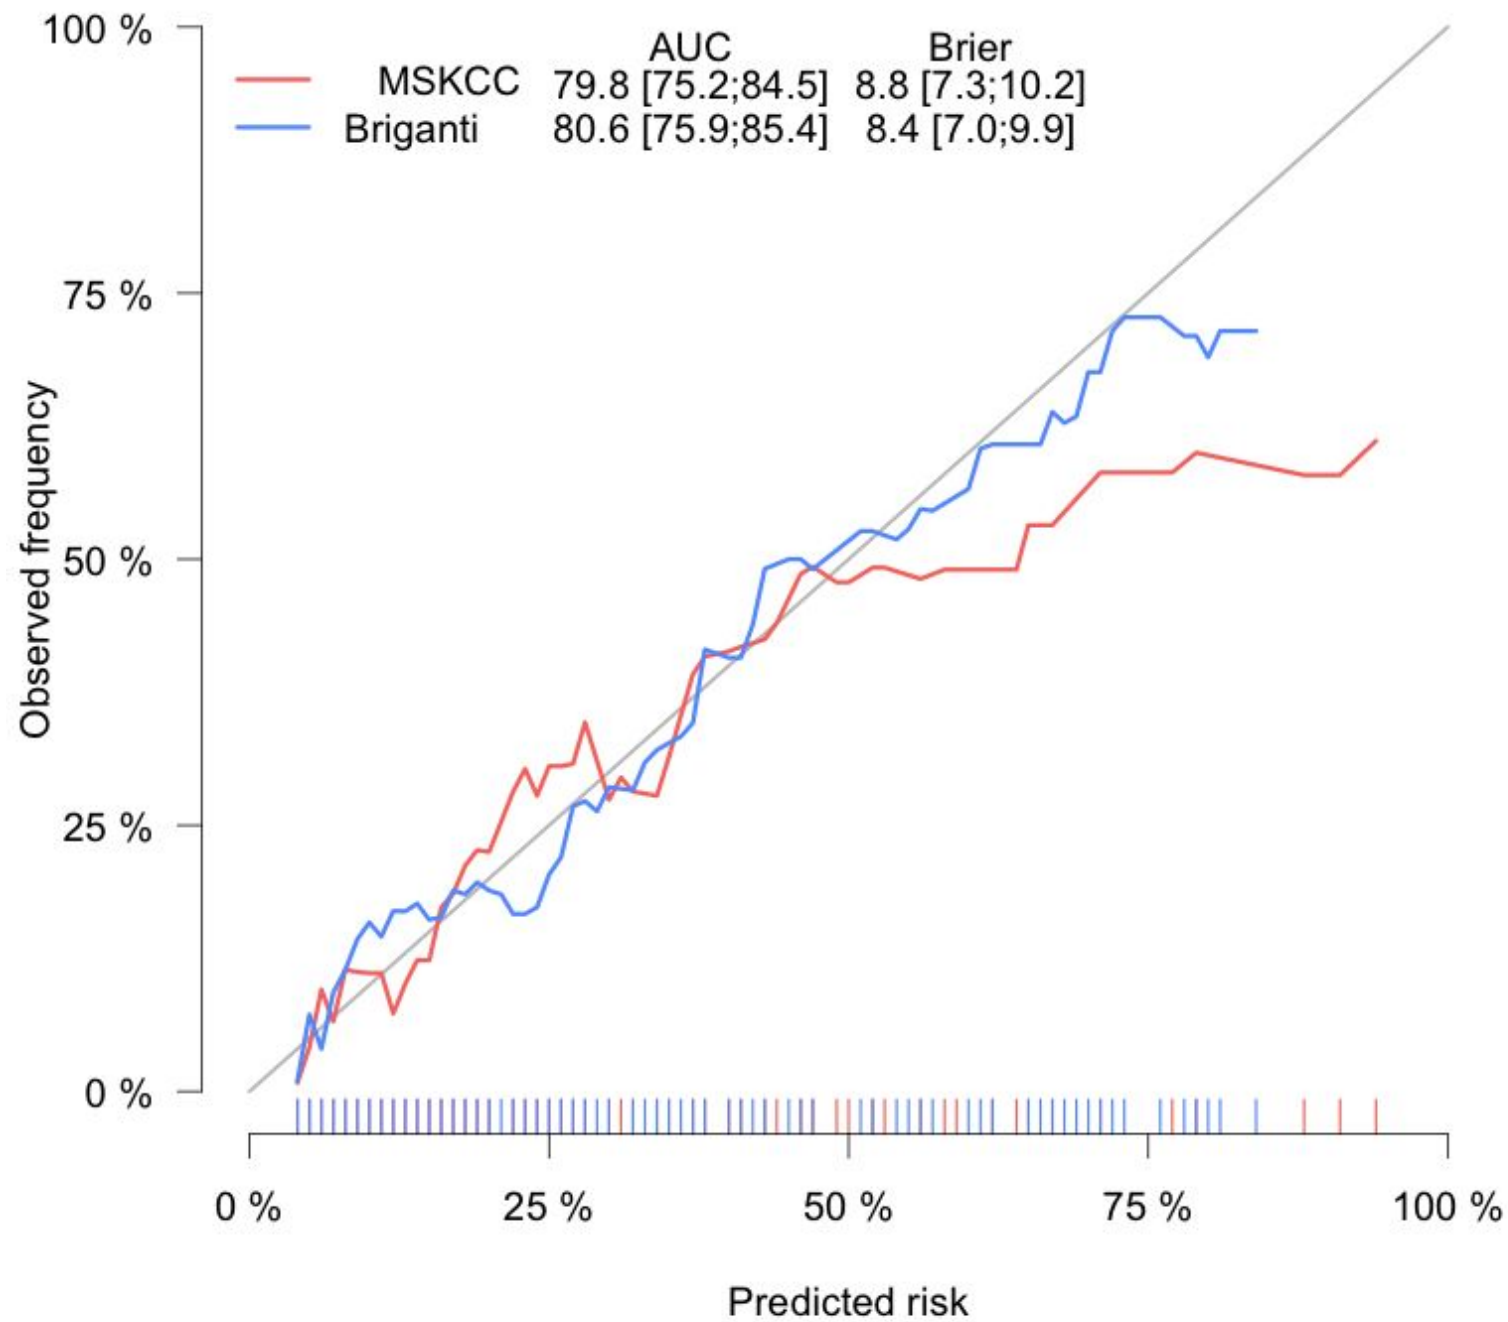

Supplement: s1 [file s1]

Biochemical Progression Free Survival

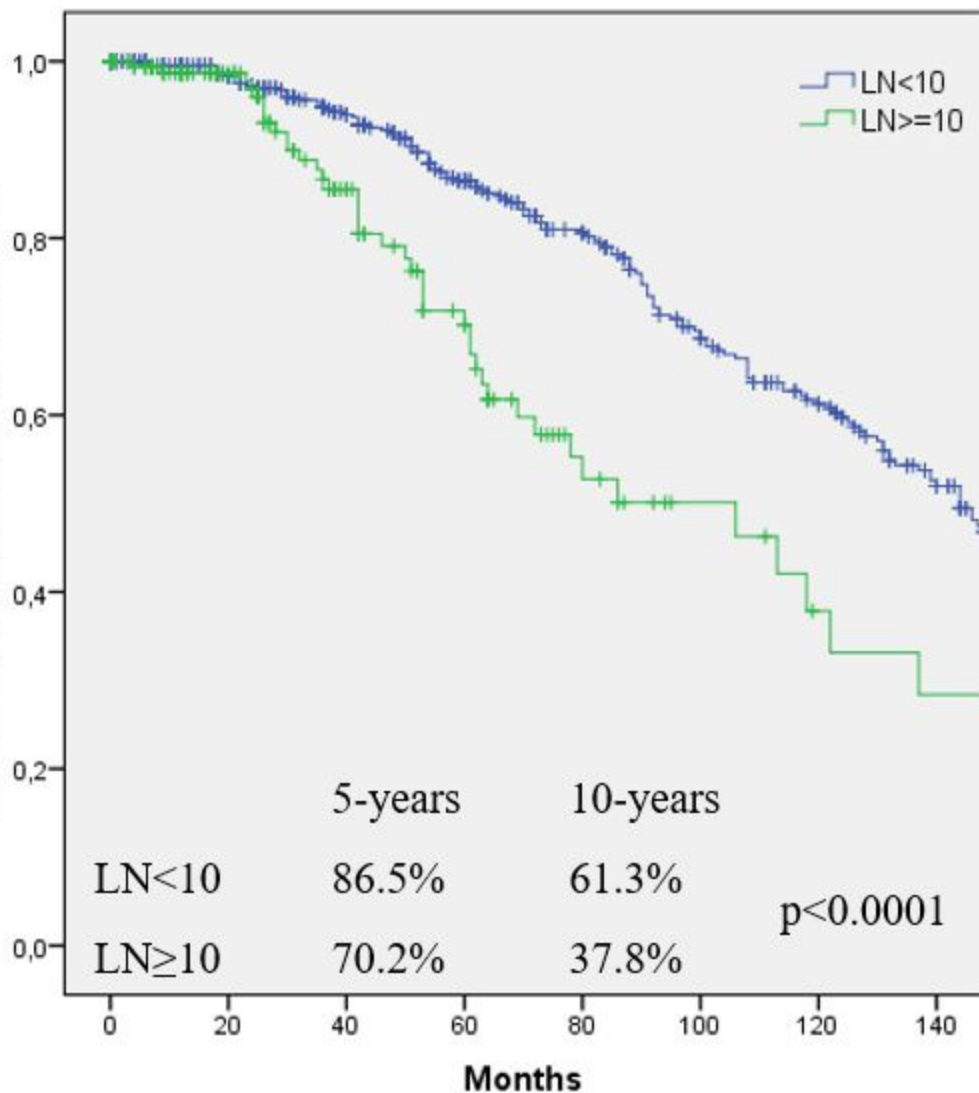

Supplement: s1 [file s1]

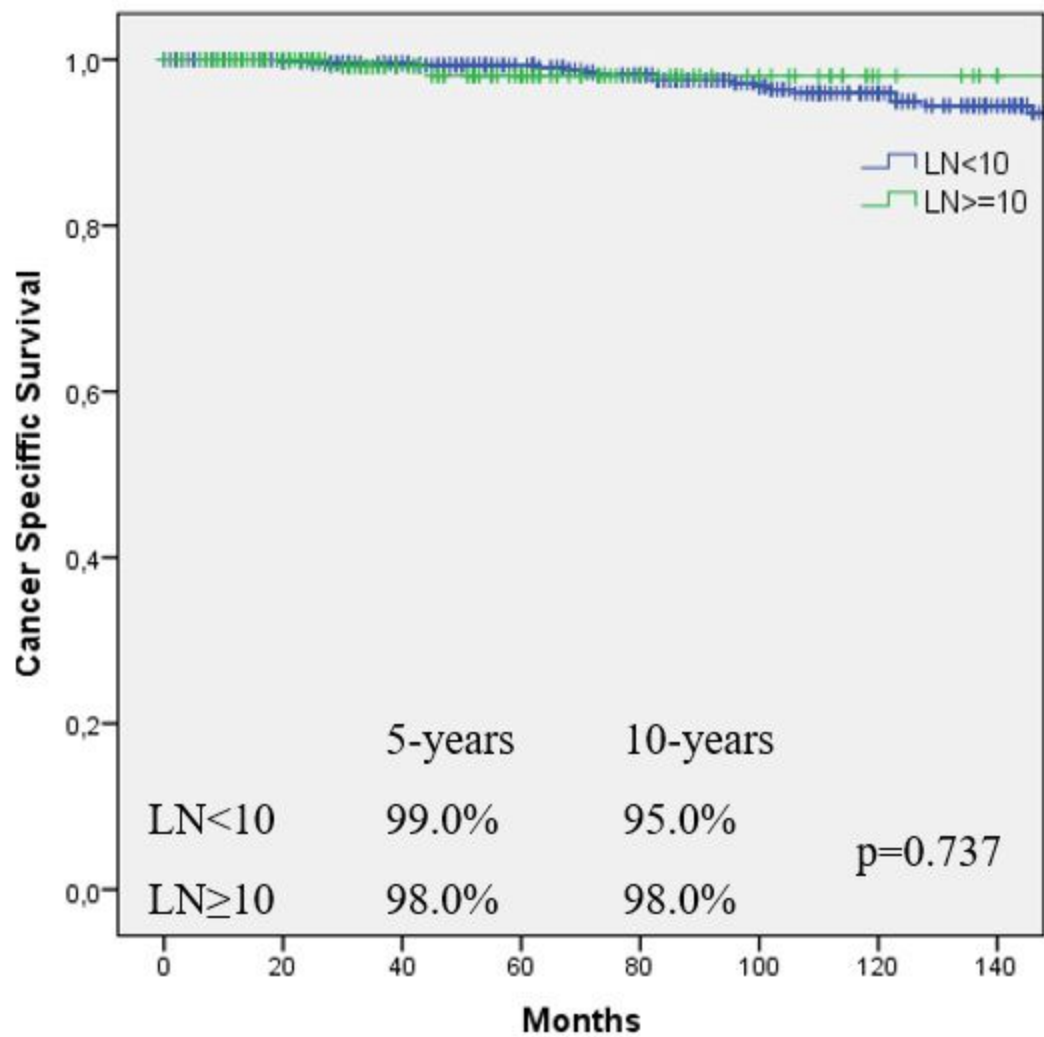

Supplement: s1 [file s1]

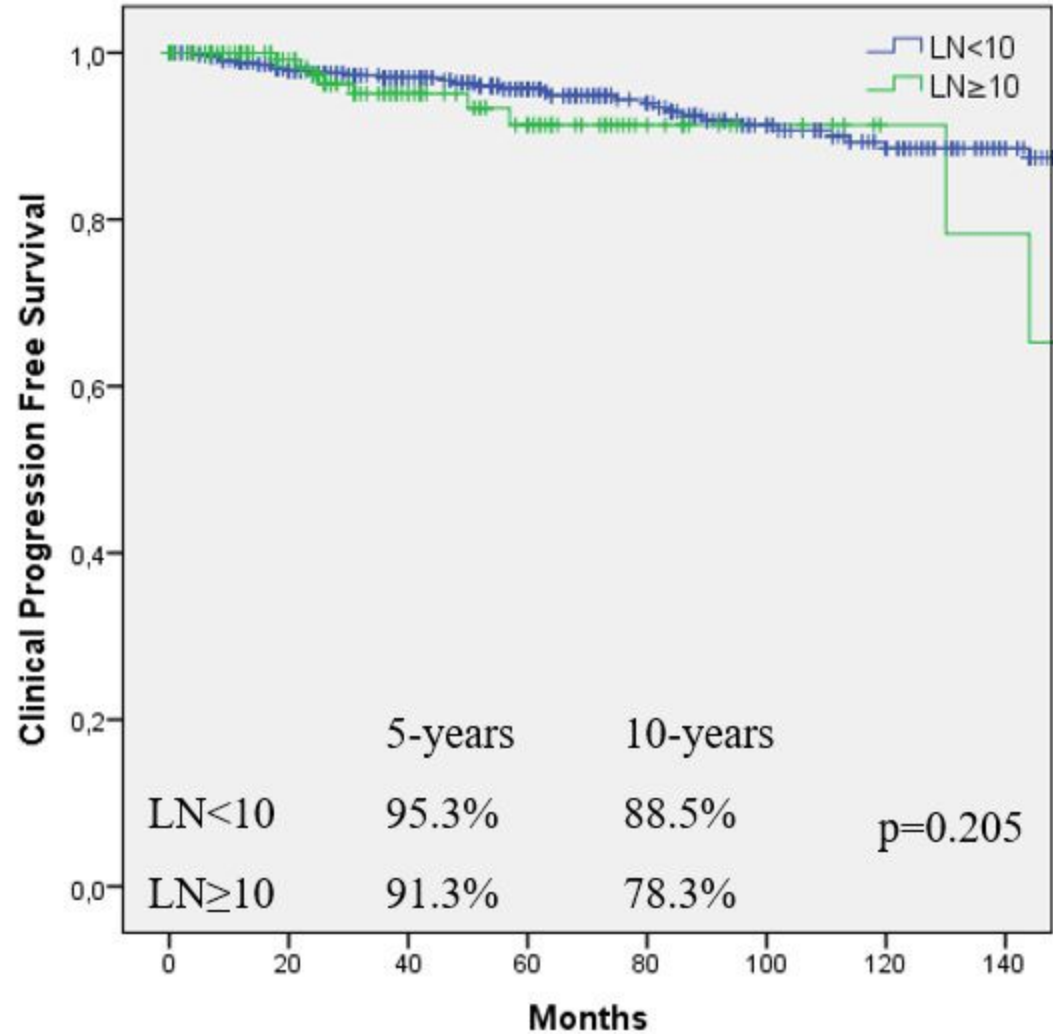

Supplement: s1 [file s1]

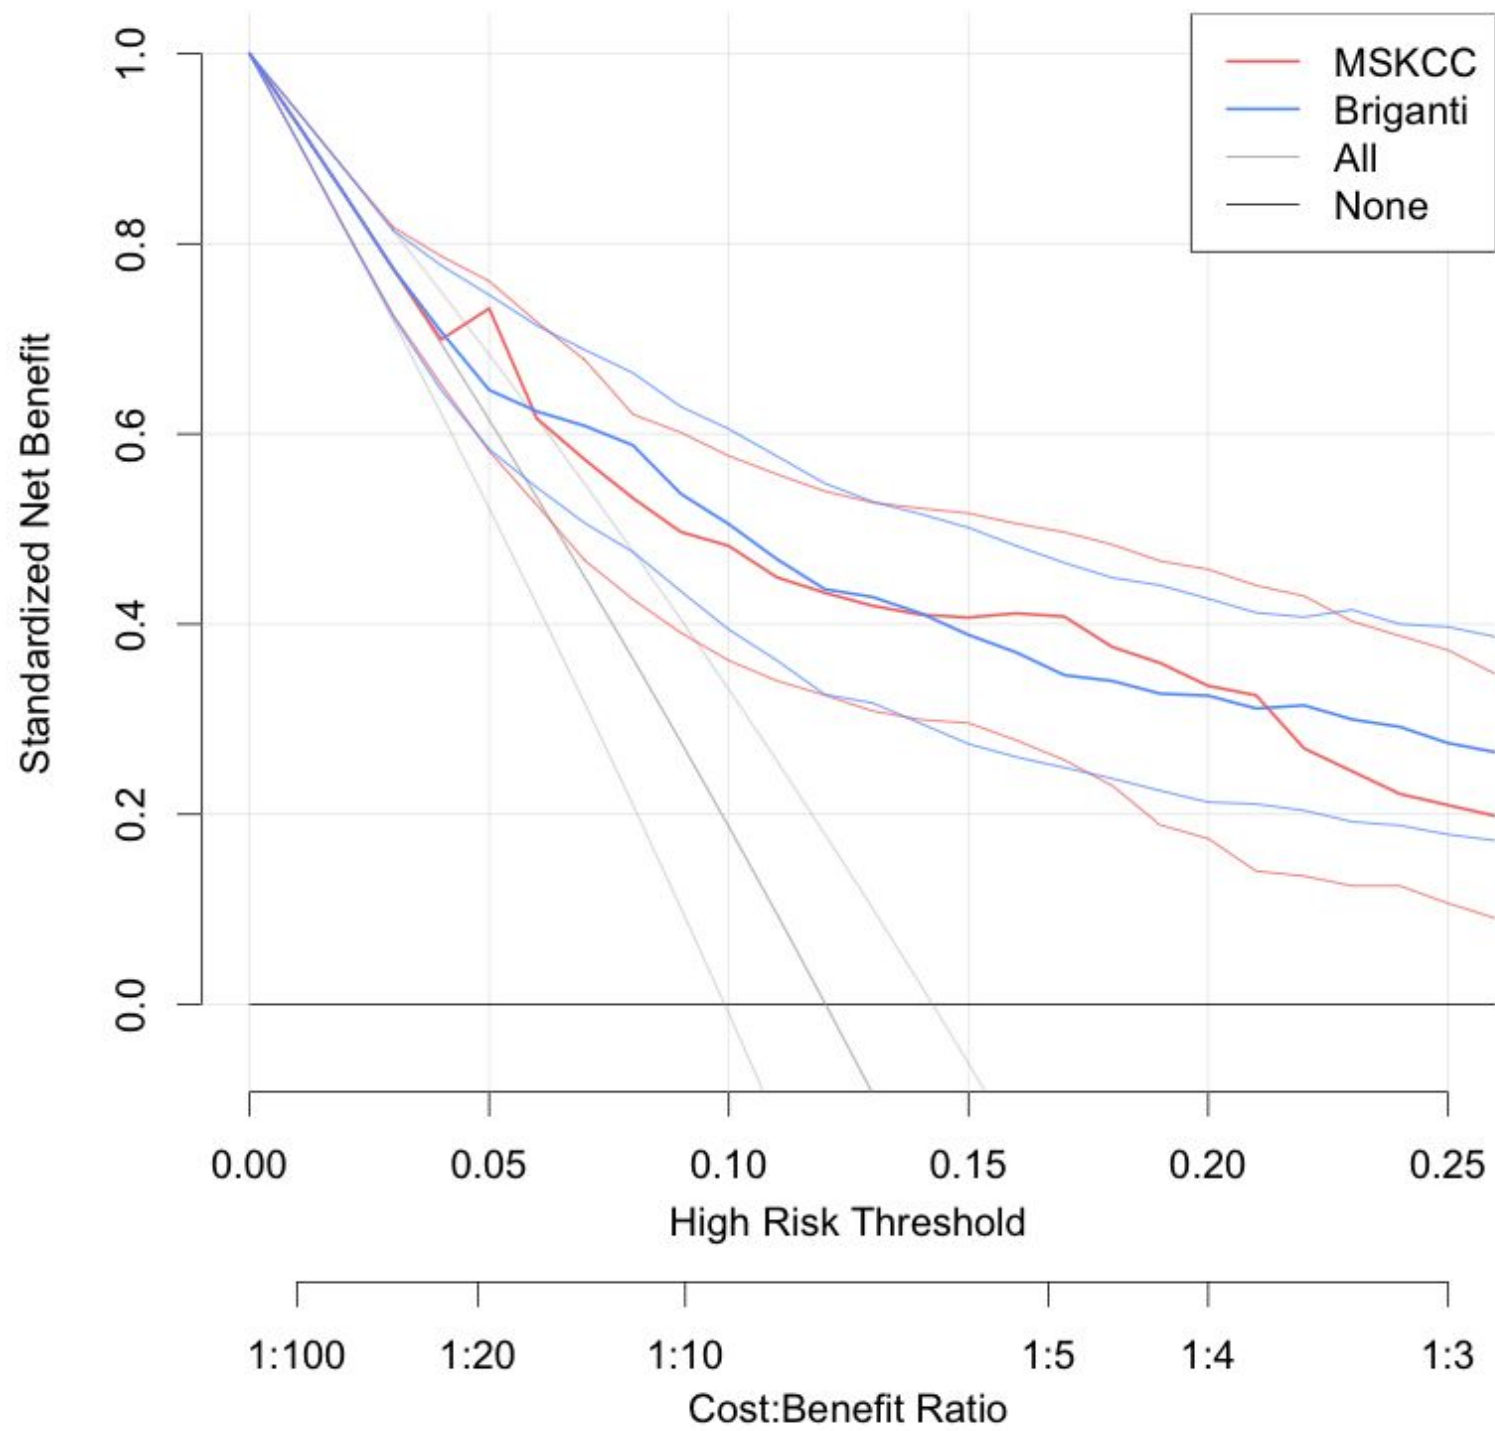

Supplement: s1 [file s1]
